# Supplementary material
Source: Springer Nature journal article supplement (https://www.springermedizin.de/resource/supplementary/12974_2011_438_MOESM9_ESM.pdf/9601288)

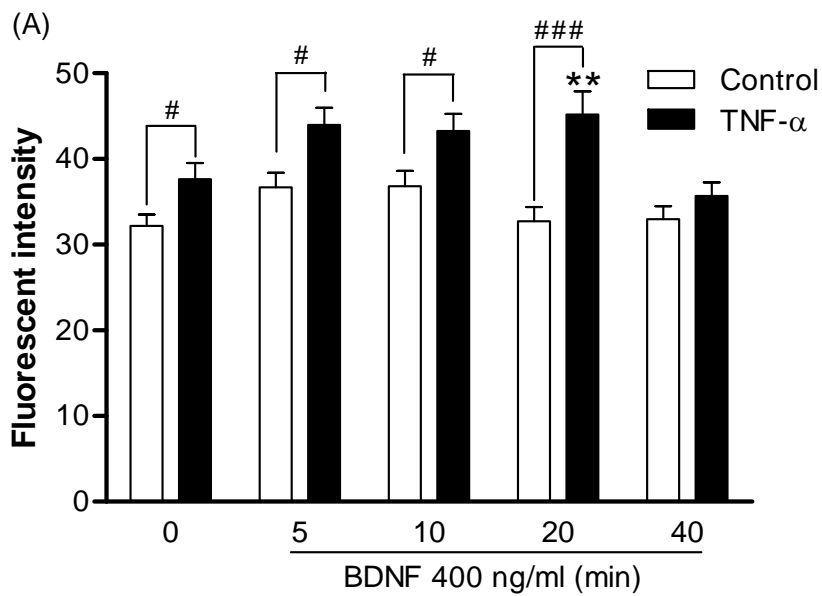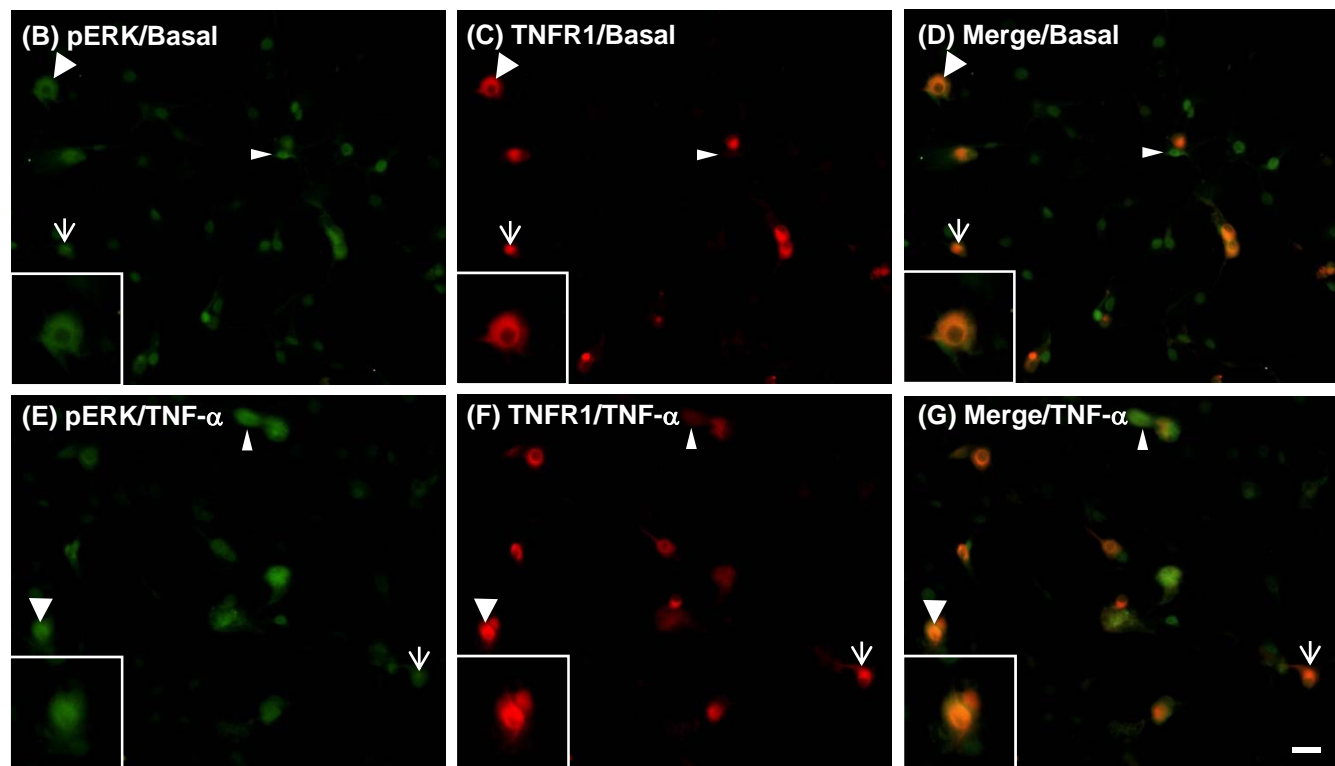

Supplement: MOESM9 [file 9601288]
